# Supplementary material for: Complexation of phenolic guests by endo- and exo-hydrogen-bonded receptors
Source: Royal Society of Chemistry journal article supplement (doi:10.1039/b302836d), 2003-01-01
Supplement: b302836d.doc [file b302836d.doc]

COMPLEXATION OF PHENOLIC GUESTS BY *ENDO*- AND *EXO*-HYDROGEN-BONDED RECEPTORS

Jessica M.C.A. Kerckhoffs, Tsutomu Ishi-i, Vasile Paraschiv, Peter Timmerman, Mercedes Crego-Calama, Seiji Shinkai, David N. Reinhoudt

**SUPPLEMENTARY**

**INFORMATION**

**(9 Pages)**

**Experimental Procedures,**

**distribution of different complexes 3b3•(DEB)6•(5a)n ,**

**MALDI-TOF data for 3b3•(DEB)6 + 5a,**

**1:6 binding model, Job plot, titration plots**

# **Experimental Section**

**General.** 1H NMR spectra were recorded at a Varian Unity 300 spectrometer or with a Varian Unity 400 WB spectrometer. Residual solvent protons were used as internal standard and chemical shifts are given relative to tetramethylsilane (TMS) or to the residual solvent protons. FAB-MS spectra were recorded with a Finnigan MAT 90 spectrometer with *m*-nitrobenzyl alcohol (NBA) as a matrix. Laser desorption ionization mass spectrometry was performed using a modified MALDI-TOF instrument (Voyager RP-DE, Perseptive Biosystems/Applied Biosystems, Framingham, MA, USA), equipped with delayed extraction. A 337 nm UV nitrogen laser producing 2 ns pulses and the mass spectra were obtained in the linear mode. No organic acid matrix could be used during the experiments due to stability of the assemblies. An 8-10 μl of the sample of a known concentration was deposited on the (cold) spot-well, adding a 0.5 μl of a 10-6 molair solution of AgOOCCF3. The samples were covered by a non-acidic liquid polymer-film, not interacting or mixing with the samples. In order to avoid crystallization of the samples, the pressure in the ion source was reduced drastically, keeping the pressure in the time-of-flight region under relatively high vacuum. The samples were introduced via an -at almost atmospheric- sample-plate insertion system. Threshold laser energies were used in order to avoid fragmentation due to high-energy laser power. After each experiment internal calibrations has been performed using a mixture of known proteins (ACTH 1-36, Bovine Insulin B oxidized, Bovine Insulin, Myoglobin (horse heart) and Cytochrome C (horse heart)) of the selected mass range. CD spectra were measured on a JASCO J-715 spectropolarimeter in 0.01 cm width cell. Compound **1a**,16b **1b**,17b **2**16b, **3a-3b**,18 and **3d**-**3f**,18 **3g,**17band **4a-4b**17b were prepared according to methods described previously (for references, see main text).

5,17-Bis({4-amino-6-[(*N*-propylcarbothioyl-3-amino-2,2-dimethylpropyl)amino]-1,3,5-triazine-2-yl}-amino-25,26,27,28-tetrapropoxycalix[4]arene (3c). Calix[4]arene dimelamine 3a (0.150 g, 0.15 mmol) was dissolved in THF (25 ml) and propyl isothiocyanate (0.15 mL, 1.4 mmol) was added. The solution was stirred for 1 h. The solvent was evaporated and the residue redissolved in CH2Cl2 and washed with water (3 times) and brine and then dried on MgSO4. The crude product was purified by column chromatography (SiO2, CH2Cl2/MeOH/NH4OH = 90/9.5/0.5). Dimelamine 3c was obtained as a white solid (0.142 mg, 79%). 13C NMR (75 MHz, CDCl3, 298K)  180.2, 166.8, 166.6, 164.1, 158.3, 151.8, 137.2, 136.6, 134.4, 133.2, 132.2, 131.8, 128.9, 121.1, 120.8, 120.3, 49.1, 48.1, 46.6, 37.2, 31.1, 23.8, 23.5, 23.0, 22.7, 11.3, 10.8, 9.8. MS (FAB): *m*/*z* required for C64H92N16O4S2 1213.7 (M+H)+, found: 1213.6.

**Assembly 3c3•(DEB)6:** 1H NMR (300 MHz, CDCl3, 298K)  13.96 (s, 2H, Ha); 13.12 (s, 2H, Hb); 8.58 (s, 2H, Hc); 7.90-7.81 (m, 2H, Hd); 7.09-7.04 (m, 6H, ArH, Hg); 6.96 (s, 2H, Hf); 6.84 (t, 3*J*(H,H) = 7.5 Hz, 2H, ArH); 6.69 (s, 2H, He); 6.40 (br d, 2H, Hm); 6.08 (s, 2H, Hh); 4.46 (ABq, 2*J*(H,H) = 12.9 Hz, 4H, ArCH2Ar), 4.07-3.54 (m, 14H, OCH2, Hi, Hk, Ho), 3.05 (ABq, 2*J*(H,H) = 13.5 Hz, 4H, ArCH2Ar), 2.77-2.64 (m, 4H, Hj, Hn), 2.37-2.30 (m, 2H, Hl), 2.22-1.75 (m, 18H, Hp, CH2), 1.21-0.74 (m, 40H, NHCH2CH2CH3, CH3), 0.64 (t, 3*J*(H,H) = 6.6 Hz, 6H, NHCH2CH2CH3).

**Formation of assemblies 23•(DEB)6, 33•(DEB)6/(CYA)6, and 43•(DEB)12/(CYA)12**

Hydrogen-bonded assemblies **2**3•(DEB)6, **3**3•(DEB)6 and **4**3•(DEB)12 were prepared by mixing calix[4]arene dimelamines **2** or **3** or calix[4]arene tetramelamine **4** with 2.5 and 4 equivalents of DEB, respectively, in CDCl3 for 15 min. Similarly, assembly **3b**3•(CYA)6 was prepared by mixing calix[4]arene dimelamine **3b** with 2.5 equivalents CYA in CDCl3. Assemblies **4**3•(CYA)12 wereeither prepared from **4**3•(DEB)12 by exchange of DEB with CYA or by direct mixing of calix[4[arene tetramelamine **4** with 4 equivalents CYA and heating at 328K for 1 week.

**Supplementary Fig. 1** Distribution of the different complexes **3b**3•(DEB)6•**5a**nat different concentration of total host, (a) 0.1 mM, (b) 1.0 mM, and (c) 10 mM, and 10 equiv of **5a** using a non-cooperative 1:6 binding model with a *Ka* of 202 M-1. H = **3b**3•(DEB)6 and G = **5a**.

**Supplementary Fig. 2** MALDI-TOF mass spectra using Ag+-labeling technique for the complexations of (a) **3b**3•(DEB)6 with **5a** (5 mM, 10 equiv. **5a**), and (b) **3b**3•(DEB)6 with **5a** (5 mM, 30 equiv. **5a**), in CH2Cl2.

The first guest molecule has six possibilities to bind to hexa-valent receptor and only one possibility to dissociate. The *K1* is therefore 6 x *Ka* (*Ka*=*ka/kd*). All the *K*-values are related to the intrinsic binding constant *Ka* in the following way:

| *K1* = 6 x *Ka* | *K4* = 3/4 x *Ka* |
| --- | --- |
| *K2* = 5/2 x *Ka* | *K5* = 2/5 x *Ka* |
| *K3* = 4/3 x *Ka* | *K6* = 1/6 x *Ka* |

The different *K*-values are now related to each other by the following equation:

*K1* = 12/5 x *K2* = 9/2 x *K3* = 8 x *K4* = 15 x *K5* = 36 x *K6*

**Supplementary Fig. 3** Non-cooperative1:6 binding model used for the calculation of *Ka*-values for the double rosette **3**3•(DEB)6.

**Supplementary Fig. 4** Job plot for the complexation of **4a**3•(DEB)12 with **5a**: the sum of [**4a**3•(DEB)12] and [**5a**] was maintained constant (4 mM) in CDCl3 at 293K.

**Supplementary Fig. 5** Plots of the induced shifts (NH) of the NMR signal NH versus [**5a**]/[assembly] in CDCl3 (1 mM for assembly) for: (a) **4a**3•(DEB)12 (●) and **4a**3•(BuCYA)12 + free DEB (▲), (b) **4b**3•(DEB)12 (●), **4b**3•(BuCYA)12 (▲), and **4b**3•(BuCYA)12 + free DEB (■).
